# Supplementary material for: Community Profile and Drivers of Predatory Myxobacteria under Different Compost Manures
Source: MDPI journal article supplement (doi:10.3390/microorganisms9112193), 2021-10-21
Supplement: s1 [file s1]

# Supplementary

## Supplementary Figures and Tables

**Table S1.**

Table S1 One-way ANOVA analysis of physicochemical properties and microbial community diversity under different compost manure treatments.

| Variables                       | Phase    |           |
|---------------------------------|----------|-----------|
|                                 | F        | P         |
| OC                              | 313949.5 | <0.001*** |
| NO <sub>3</sub> <sup>-</sup> -N | 105678.5 | <0.001*** |
| NH <sub>4</sub> <sup>+</sup> -N | 2698533  | <0.001*** |
| TN                              | 11329.87 | <0.001*** |
| C/N                             | 25.93    | <0.001*** |
| TK                              | 26621.98 | <0.001*** |
| pH                              | 8.585    | 0.003**   |
| TP                              | 11460.81 | <0.001*** |
| Ca <sup>2+</sup>                | 6373.427 | <0.001*** |
| Mg <sup>2+</sup>                | 1703.392 | <0.001*** |
| Na <sup>+</sup>                 | 6714.4   | <0.001*** |
| Bacterial Shannon index         | 823.659  | <0.001*** |
| myxobacteria Shannon index      | 101.905  | <0.001*** |
| Bacterial Chao1 index           | 170.891  | <0.001*** |
| myxobacteria Chao1 index        | 27.214   | <0.001*** |
| myxobacteria abundance          | 3.179    | 0.063     |
| Bacterial abundance             | 6.993    | 0.006**   |

Note: OC, organic carbon; NO<sub>3</sub><sup>-</sup>-N, nitrate nitrogen; NH<sub>4</sub><sup>+</sup>-N, ammonia nitrogen; TN, total nitrogen; TP, total phosphorus; C/N, total organic carbon / total nitrogen; TK, total potassium; Ca<sup>2+</sup>, Calcium ion; Mg<sup>2+</sup>, Magnesium ions; Na<sup>+</sup>, Sodium ion. \*\*\*P < 0.001; \*\*P < 0.01; \*P < 0.05

**Table S2.**

Table S2 PERMANOVA analysis of community under different compost manure treatments.

| Group | Df | Sums of squares | Mean squares | F.Model  | Variation (R2) | Pr (>F) | Sig |
|-------|----|-----------------|--------------|----------|----------------|---------|-----|
| CM/SM | 1  | 1.7593          | 1.7593       | 154.9796 | 0.963          | 0.025   | *   |
| CM/CD | 1  | 1.7010          | 1.7010       | 65.8035  | 0.916          | 0.025   | *   |
| CM/WC | 1  | 1.4227          | 1.4227       | 45.8357  | 0.884          | 0.031   | *   |
| SM/CD | 1  | 1.8912          | 1.8912       | 103.8493 | 0.945          | 0.032   | *   |
| SM/WC | 1  | 1.8591          | 1.8591       | 79.4450  | 0.930          | 0.031   | *   |
| CD/WC | 1  | 1.6570          | 1.6570       | 43.7226  | 0.879          | 0.023   | *   |

Note: CM, chicken manure; SM, swine manure; CD, Cow dung; WC, wormcast. \*\*\*P < 0.001; \*\*P < 0.01; \*P < 0.05

**Table S3.**

Table S3 Contributions of compost parameters to the myxobacteria community composition and diversity (multivariate regression trees analysis).

| Branch condition   | Branch point (%) |  |                  |  | col_total_tree | col_total_species |
|--------------------|------------------|--|------------------|--|----------------|-------------------|
|                    | Ca <sup>2+</sup> |  | Na <sup>2+</sup> |  |                |                   |
|                    | 1.16 g·kg-1      |  | 3.2g·kg-1        |  |                |                   |
| BIrii41            | 97.84916         |  | 0.338304407      |  | 98.187462      | 98.90377          |
| Nannocystaceae     | 0.1471139        |  | 0.114221722      |  | 0.2613356      | 0.2797915         |
| Haliangiaceae      | 0.049495         |  | 0.562034082      |  | 0.6115290      | 0.6425704         |
| sandaracinaceae    | 5.27335E-05      |  | 0.024308855      |  | 0.0243615      | 0.07960629        |
| polyangiaceae      | 0.01129674       |  | 0.048546237      |  | 0.0598429      | 0.06605072        |
| Archangiaceae      | 0.002651495      |  | 0.008032931      |  | 0.0106844      | 0.02145776        |
| phaselicystidaceae | 0.002517264      |  | 0.001844366      |  | 0.0043616      | 0.006756866       |
| total_col          | 98.06229         |  | 1.097292599      |  | 99.159578      | 100               |

| Branch condition | Branch point (%) |              |              |                    | col_total_tree | col_total_species |
|------------------|------------------|--------------|--------------|--------------------|----------------|-------------------|
|                  | TP               | OC           | TK           | NO <sub>3</sub> -N |                |                   |
|                  | 12.43 g·kg-1     | 415.8 g·kg-1 | 10.76 g·kg-1 | 506 mg·kg-1        |                |                   |
| Observed         | 28.0193          | 1.7615       | 0.6444       | 0.1887             | 30.614         | 31.5509           |
| Chao1            | 26.7229          | 2.4597       | 1.4703       | 0.941              | 31.5939        | 33.6073           |
| Shannon          | 0.3065           | 0.0105       | 0.0185       | 0.0095             | 0.345          | 0.3849            |
| ACE              | 28.8361          | 2.4563       | 1.224        | 0.8819             | 33.3983        | 34.4143           |
| Simpson          | 0.0363           | 0.0008       | 0.0016       | 0.0008             | 0.0394         | 0.0425            |
| Total_col        | 83.9211          | 6.6888       | 3.3589       | 2.0219             | 95.9908        | 100               |

**Table S4**

Table S4 Myxobacteria relative abundance for each split.

| Split condition    | Split 1         |                 | Split 2        |                |
|--------------------|-----------------|-----------------|----------------|----------------|
|                    | Ca<1.16<br>g/kg | Ca≥1.16<br>g/kg | Na≥3.2<br>g/kg | Na<3.2<br>g/kg |
| BIrii41            | 0.010           | 0.990           | 0.062          | 0.928          |
| Nannocystaceae     | 0.098           | 0.902           | 0.372          | 0.530          |
| Haliangiaceae      | 0.095           | 0.905           | 0.763          | 0.142          |
| sandaracinaceae    | 0.353           | 0.647           | 0.385          | 0.262          |
| polyangiaceae      | 0.113           | 0.887           | 0.481          | 0.406          |
| Archangiaceae      | 0.359           | 0.641           | 0.521          | 0.120          |
| phaselicystidaceae | 0.194           | 0.806           | 0.333          | 0.472          |
| n                  | 4               | 12              | 4              | 8              |

**Table S5**

Table S5 Single factor correlation network node attribute table.

| node name                  | degree | clustering |
|----------------------------|--------|------------|
| o__Sphingomonadales        | 9      | 0.611111   |
| o__Sphingobacteriales      | 9      | 0.583333   |
| o__Flavobacteriales        | 9      | 0.611111   |
| o__Caulobacterales         | 9      | 0.638889   |
| <b>o__Myxococcales</b>     | 8      | 0.678571   |
| o__Acidimicrobiales        | 8      | 0.535714   |
| o__Bacillales              | 8      | 0.642857   |
| o__Pseudomonadales         | 8      | 0.714286   |
| o__Clostridiales           | 8      | 0.642857   |
| o__Cellvibrionales         | 8      | 0.678571   |
| o__JG30-KF-CM45            | 8      | 0.714286   |
| o__Cytophagales            | 8      | 0.571429   |
| o__Anaerolineales          | 7      | 0.761905   |
| o__Micrococcales           | 7      | 0.761905   |
| o__norank_c__Acidobacteria | 7      | 0.666667   |
| o__Burkholderiales         | 6      | 0.8        |
| o__Rhizobiales             | 6      | 0.666667   |
| o__Rhodospirillales        | 6      | 0.533333   |
| o__Bacteroidales           | 4      | 1          |
| o__Xanthomonadales         | 1      | 0          |

Note: Node name is the name of the node in the network graph; Degree represents the degree of the node in the network graph, that is, the number of nodes connected to a node; Clustering is the clustering coefficient of the node, which represents the connection between a node and its neighboring nodes.

**Figure S1.**

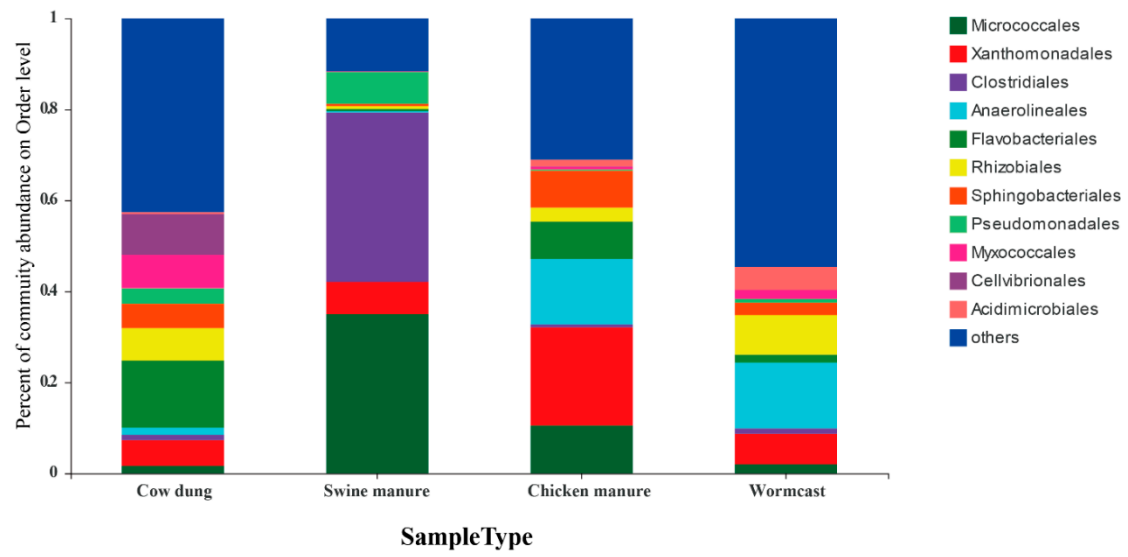

**Figure S1.** The relative abundance of bacteria under different compost manure treatments.

**Figure S2.**

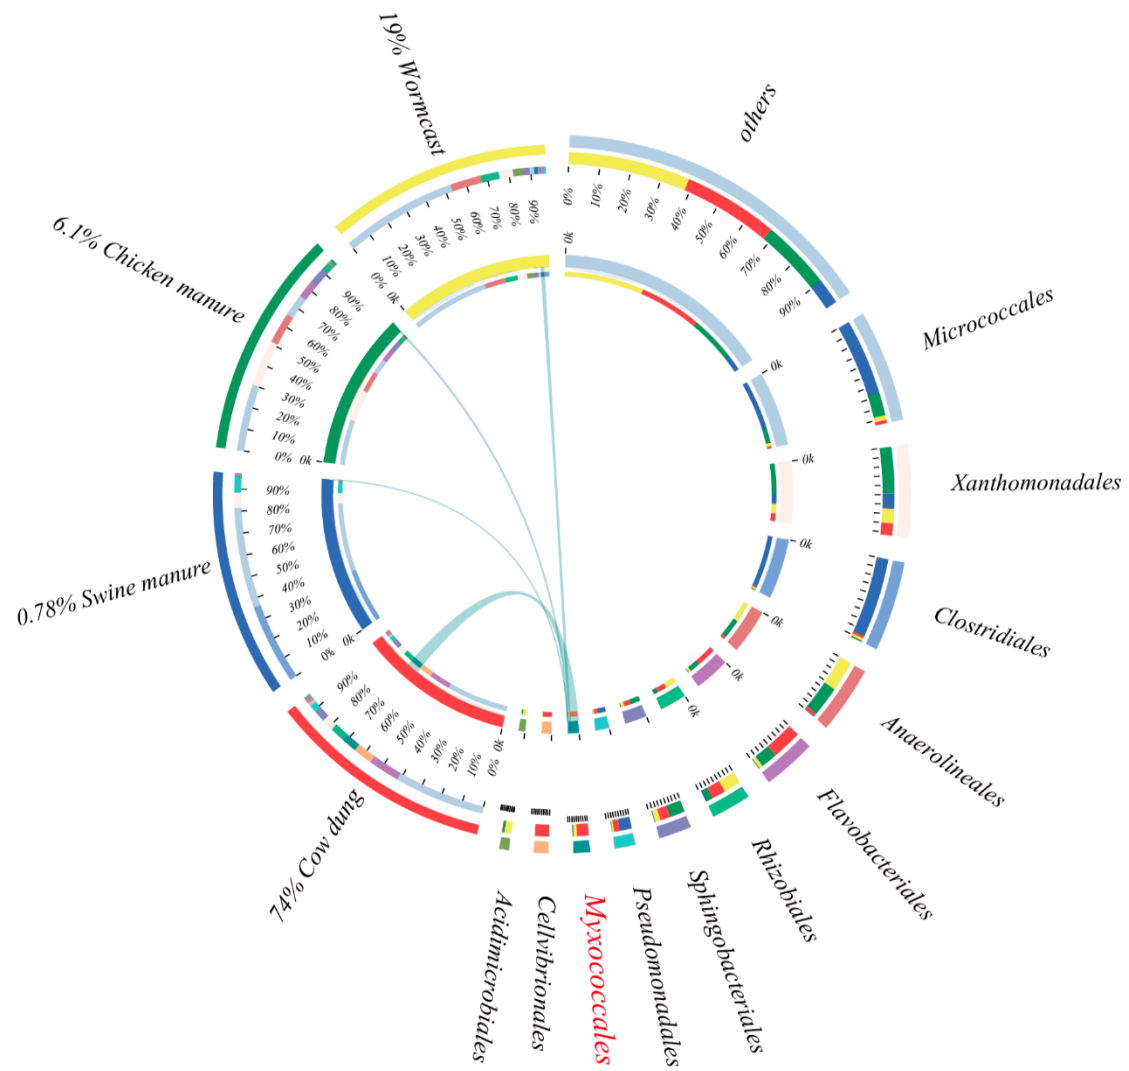

**Figure S2.** Circos plot showing Mycobacteria community abundance and composition under different compost manure treatments.

**Figure S3.**

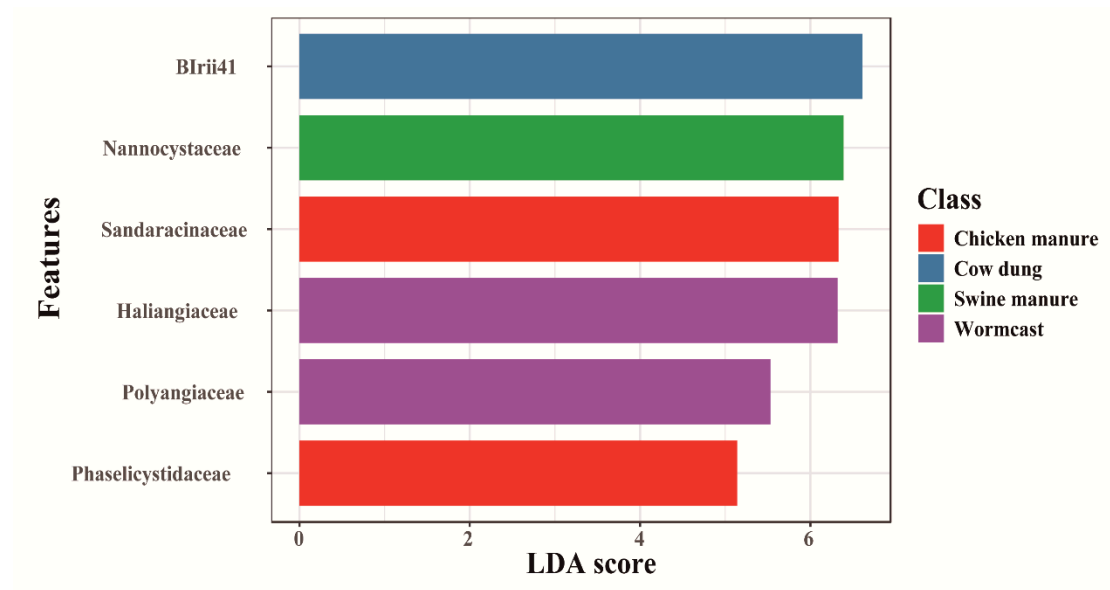

**Figure S3.** The LEfSe method identified significant differences among communities with different compost manures. Taxonomic units with significant differences ( $P < 0.05$ ) in abundance between compost manures are represented by color.



**Figure S4.**

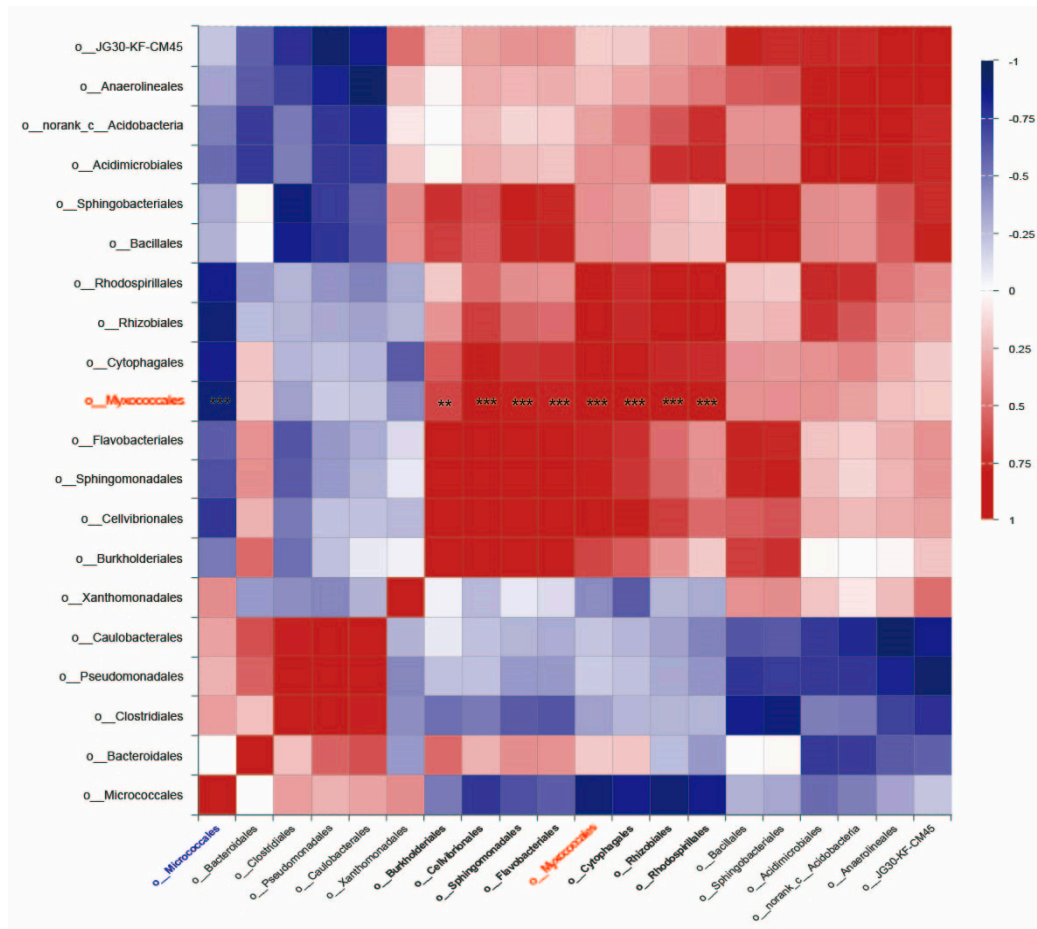

**Figure S4.** Heatmap plot showing correlation of dominant bacterial order under different compost manure treatments. Note: \*\*\* $P < 0.001$ ; \*\* $P < 0.01$ ; \* $P < 0.05$
